# Supplementary material for: Can land degradation drive differences in the C exchange of two similar semiarid ecosystems?
Source: Copernicus journal article supplement (doi:10.5194/bg-15-263-2018), 2018-01-11
Supplement: Supplementary file 1 [file bg-15-263-2018-supplement.pdf]

Supplement of Biogeosciences, 15, 263–278, 2018  
<https://doi.org/10.5194/bg-15-263-2018-supplement>  
© Author(s) 2018. This work is distributed under  
the Creative Commons Attribution 3.0 License.

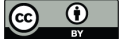

*Supplement of*

## **Can land degradation drive differences in the C exchange of two similar semiarid ecosystems?**

**Ana López-Ballesteros et al.**

*Correspondence to:* Ana López-Ballesteros (alpzballesteros@gmail.com)

The copyright of individual parts of the supplement might differ from the CC BY 3.0 License.

## Supplementary Material

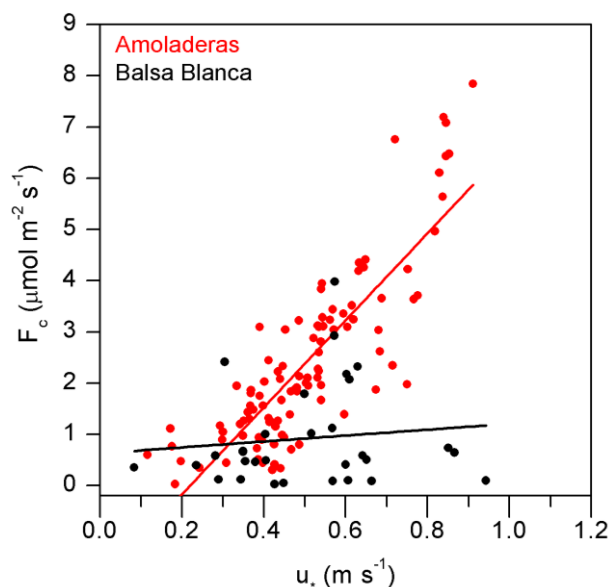

Figure S1: Half-hourly net CO<sub>2</sub> fluxes of maximum quality (QC flag=0) versus friction velocity ( $u_*$ ) corresponding to daytime hours during the extremely dry periods when subterranean ventilation dominates the net CO<sub>2</sub> flux. Red and black dots represent Amoladeras and Balsa Blanca, respectively.

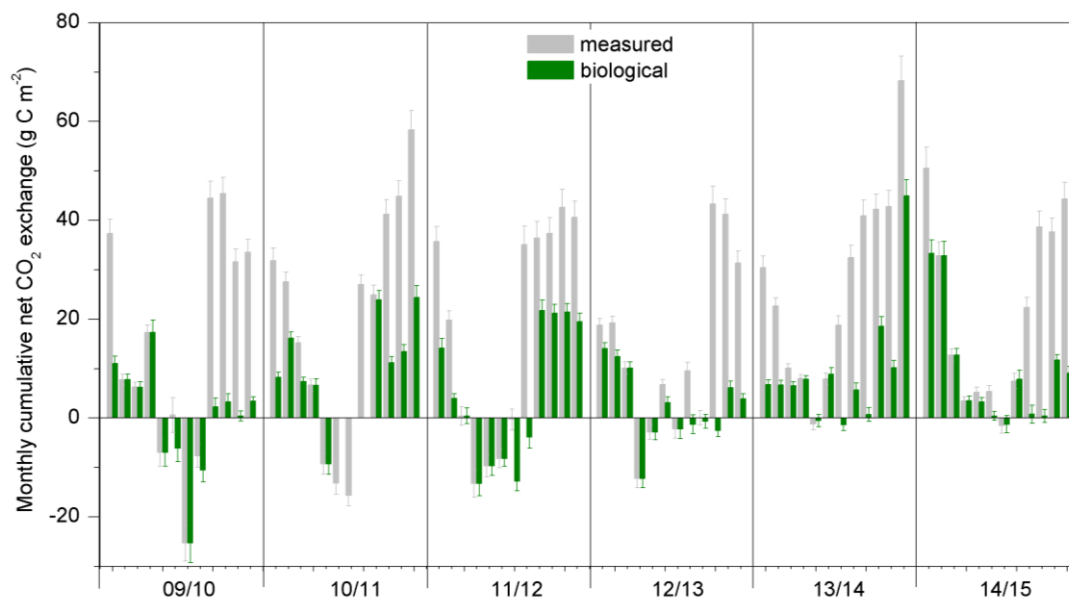

Figure S2: Cumulative measured and biological (after applying the ventilation model) net CO<sub>2</sub> exchange for every month of the study period (5 hydrological years; 2009-2015) in Amoladeras.

5 **Table S1: Results of the two-sided Wilcoxon summed rank test used to assess differences between meteorological variables measured at each experimental site over the all periods. Medians of the absolute (Diff) and standardized differences (Diff and Diff<sub>st</sub>) between the samples (Amoladeras minus Balsa Blanca), p-values and number of observations (n) are detailed.**

| Variables                                           | All periods |                    |           |        |
|-----------------------------------------------------|-------------|--------------------|-----------|--------|
|                                                     | Diff        | Diff <sub>st</sub> | p-value   | n      |
| PPFD ( $\mu\text{mol m}^{-2} \text{s}^{-1}$ )       | 0.4701      | 0.0009             | 0         | 205751 |
| Net radiation ( $\text{W m}^{-2}$ )                 | -8.8620     | -0.0457            | 0         | 197924 |
| T <sub>air</sub> (°C)                               | 0.1928      | 0.0310             | 6.42E-10  | 182240 |
| VPD (hPa)                                           | 0.5358      | 0.0783             | 4.38E-104 | 166918 |
| RH (%)                                              | -3.1947     | -0.1636            | 6.39E-244 | 197649 |
| u* ( $\text{m s}^{-1}$ )                            | -0.0016     | -0.0054            | 0.1214    | 166346 |
| WS ( $\text{m s}^{-1}$ )                            | 0.3621      | 0.1628             | 0         | 166359 |
| WS <sub>max</sub> ( $\text{m s}^{-1}$ )             | 0.4327      | 0.1001             | 5.53E-132 | 165458 |
| Pressure (hPa)                                      | 2.3226      | 0.3737             | 0         | 166336 |
| Precipitation (mm)                                  | -0.0001     | -1.95E-05          | 0.0003    | 204892 |
| CO <sub>2, 0.05m</sub> (ppm)                        | -93.8644    | -0.4027            | 0         | 46340  |
| CO <sub>2, 1.50m</sub> (ppm)                        | 888.9239    | 1.1196             | 0         | 50133  |
| T <sub>0.05m</sub> (°C)                             | 0.9215      | 0.0927             | 5.51E-21  | 46337  |
| T <sub>1.50m</sub> (°C)                             | 0.5780      | 0.1476             | 1.43E-51  | 50137  |
| VWC <sub>0.05m</sub> ( $\text{m}^3 \text{m}^{-3}$ ) | 0.0372      | 0.8265             | 0         | 52353  |
| VWC <sub>1.50m</sub> ( $\text{m}^3 \text{m}^{-3}$ ) | -0.0123     | -0.8385            | 0         | 53865  |

**Table S2: Results of the two-sided Wilcoxon summed rank test used to assess differences between meteorological variables measured at each experimental site from May to September. Medians of the absolute (Diff) and standardized differences (Diff<sub>st</sub>) between the samples (Amoladeras minus Balsa Blanca), p-values and number of observations (n) are detailed.**

5

| Variables                                           | May - September |                    |           |       |
|-----------------------------------------------------|-----------------|--------------------|-----------|-------|
|                                                     | Diff            | Diff <sub>st</sub> | p-value   | n     |
| PPFD ( $\mu\text{mol m}^{-2} \text{s}^{-1}$ )       | 0.5230          | 0.0009             | 8.11E-147 | 84491 |
| Net radiation ( $\text{W m}^{-2}$ )                 | -10.9546        | -0.0476            | 4.78E-167 | 81019 |
| T <sub>air</sub> (°C)                               | 0.8378          | 0.1935             | 1.53E-145 | 77866 |
| VPD (hPa)                                           | 1.1136          | 0.1370             | 4.50E-90  | 71474 |
| RH (%)                                              | -2.0229         | -0.1031            | 1.21E-38  | 80950 |
| u* ( $\text{m s}^{-1}$ )                            | -0.0186         | -0.0563            | 8.47E-31  | 71194 |
| WS ( $\text{m s}^{-1}$ )                            | 0.1720          | 0.0793             | 1.84E-31  | 71195 |
| WS <sub>max</sub> ( $\text{m s}^{-1}$ )             | 0.0498          | 0.0124             | 0.0749    | 70635 |
| Pressure (hPa)                                      | 2.2120          | 0.5828             | 0         | 71188 |
| Precipitation (mm)                                  | 0.0000          | -4.84E-05          | 4.29E-05  | 83860 |
| CO <sub>2, 0.05m</sub> (ppm)                        | -89.2404        | -0.6578            | 9.99E-207 | 21413 |
| CO <sub>2, 1.50m</sub> (ppm)                        | 1109.1440       | 1.3517             | 0         | 24347 |
| T <sub>0.05m</sub> (°C)                             | -0.8057         | -0.1160            | 3.04E-16  | 21410 |
| T <sub>1.50m</sub> (°C)                             | -0.1570         | -0.0591            | 3.13E-07  | 24350 |
| VWC <sub>0.05m</sub> ( $\text{m}^3 \text{m}^{-3}$ ) | 0.0286          | 1.2724             | 0         | 25231 |
| VWC <sub>1.50m</sub> ( $\text{m}^3 \text{m}^{-3}$ ) | 0.0011          | 0.0674             | 3.51E-18  | 24570 |

**Table S3: Results of the two-sided Wilcoxon summed rank test used to assess differences between meteorological variables measured at each experimental site from May to September during daytime. Medians of the absolute (Diff) and standardized differences (Diff<sub>st</sub>) between the samples (Amoladeras minus Balsa Blanca), p-values and number of observations (n) are detailed.**

5

| Variables                                           | May – September Daytime |                    |          |       |
|-----------------------------------------------------|-------------------------|--------------------|----------|-------|
|                                                     | Diff                    | Diff <sub>st</sub> | p-value  | n     |
| PPFD ( $\mu\text{mol m}^{-2} \text{s}^{-1}$ )       | 64.3400                 | 0.1378             | 5.62E-42 | 38963 |
| Net radiation ( $\text{W m}^{-2}$ )                 | -21.9460                | -0.1205            | 4.80E-34 | 38963 |
| T <sub>air</sub> (°C)                               | 0.1939                  | 0.0502             | 1.39E-06 | 37480 |
| VPD (hPa)                                           | -0.7579                 | -0.0938            | 3.87E-20 | 34430 |
| RH (%)                                              | 2.9921                  | 0.1784             | 1.45E-65 | 38935 |
| u* ( $\text{m s}^{-1}$ )                            | -0.0430                 | -0.1340            | 3.76E-87 | 34284 |
| WS ( $\text{m s}^{-1}$ )                            | 0.0356                  | 0.0165             | 0.1341   | 34285 |
| WS <sub>max</sub> ( $\text{m s}^{-1}$ )             | -0.2920                 | -0.0796            | 5.83E-14 | 33994 |
| Pressure (hPa)                                      | 2.1101                  | 0.5602             | 0        | 34280 |
| Precipitation (mm)                                  | 0.0000                  | 5.32E-05           | 0.9875   | 38963 |
| CO <sub>2, 0.05m</sub> (ppm)                        | -149.513                | -1.1396            | 0        | 9816  |
| CO <sub>2, 1.50m</sub> (ppm)                        | 1046.358                | 1.3062             | 0        | 11385 |
| T <sub>0.05m</sub> (°C)                             | -1.473                  | -0.2119            | 2.70E-21 | 9813  |
| T <sub>1.50m</sub> (°C)                             | -0.220                  | -0.0834            | 4.75E-07 | 11385 |
| VWC <sub>0.05m</sub> ( $\text{m}^3 \text{m}^{-3}$ ) | 0.028                   | 1.2839             | 0        | 11303 |
| VWC <sub>1.50m</sub> ( $\text{m}^3 \text{m}^{-3}$ ) | 0.001                   | 0.0547             | 1.05E-09 | 11462 |
